# CORRECTION

## Correction: Cooperation Is Not Enough Exploring Social-Ecological Micro-Foundations for Sustainable Common-Pool Resource Use

The *PLOS ONE* Staff

### Notice of Republication

This article was republished on September 8, 2016, to correct an error in the article title that was introduced during the typesetting process. The publisher apologizes for the error. Please download this article again to view the correct version. The originally published, uncorrected article and the republished, corrected article are provided here for reference.

### Supporting Information

**S1 File. Originally published, uncorrected article.**  
(PDF)

**S2 File. Republished, corrected article.**  
(PDF)

### Reference

1. Schill C, Wijermans N, Schlüter M, Lindahl T (2016) Cooperation Is Not Enough Exploring Social-Ecological Micro-Foundations for Sustainable Common-Pool Resource Use. *PLoS ONE* 11(8): e0157796. doi: [10.1371/journal.pone.0157796](https://doi.org/10.1371/journal.pone.0157796) PMID: [27556175](https://pubmed.ncbi.nlm.nih.gov/27556175/)

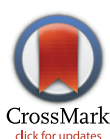

### OPEN ACCESS

**Citation:** The *PLOS ONE* Staff (2016) Correction: Cooperation Is Not Enough Exploring Social-Ecological Micro-Foundations for Sustainable Common-Pool Resource Use. *PLoS ONE* 11(11): e0165009. doi:[10.1371/journal.pone.0165009](https://doi.org/10.1371/journal.pone.0165009)

**Published:** November 15, 2016

**Copyright:** © 2016 The PLOS ONE Staff. This is an open access article distributed under the terms of the [Creative Commons Attribution License](https://creativecommons.org/licenses/by/4.0/), which permits unrestricted use, distribution, and reproduction in any medium, provided the original author and source are credited.
